# Supplementary material for: A neurotoxin that specifically targets Anopheles mosquitoes
Source: PubMed Central journal article supplement (PMC6599013; doi:10.1038/s41467-019-10732-w), 2019-06-28
Supplement: 41467_2019_10732_MOESM1_ESM.pdf [file 41467_2019_10732_MOESM1_ESM.pdf]

**A neurotoxin that specifically targets  
Anopheles mosquitoes**

Contreras et al.

### Supplementary notes

A construct containing PMP1 gene in pHT 315 under *Bacillus thuringiensis* Cry3A promoter obtained from amplification of *Pbm* genomic sequence was first created and bioassayed with *A. aegypti* and *An. gambiae* larvae, along with constructs NTNH-PMP1 and NTNH-OrfX1-3-PMP1 (Fig 3A). Preliminary data showed no mortality. We next created an optimized construct with the *Bacillus thuringiensis* optimized sequence of PMP1 and cloned in pHT315 under a stronger *B. thuringiensis* promoter Cyt1A, but again, no toxicity was observed.

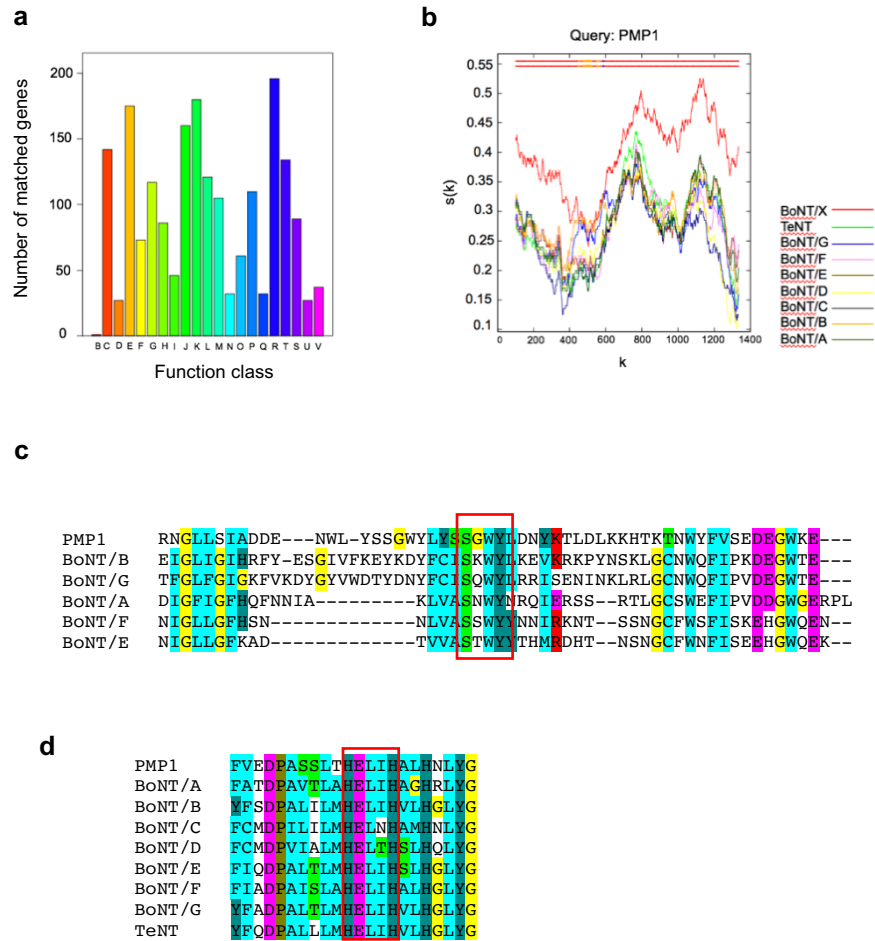

**Supplementary Figure 1. *Pbm* gene functional annotation and analysis of PMP1 sequence.** A) Gene functional annotation of *Pbm* genome. Annotated genes were aligned with COG function classification database. B: Chromatin structure and dynamics; C: Energy production and conversion; D: Cell cycle control, cell division, chromosome partitioning; E: Amino acid transport and metabolism; F: Nucleotide transport and metabolism; G: Carbohydrate transport and metabolism; H: Coenzyme transport and metabolism; I: Lipid transport and metabolism; J: Translation, ribosomal structure and biogenesis; K: Transcription; L: Replication, recombination and repair; M: Cell wall/membrane/envelope biogenesis; N: Cell motility; O: Posttranslational modification, protein turnover, chaperones; P: Inorganic ion transport and metabolism; Q: Secondary metabolites biosynthesis, transport and catabolism; R: General function prediction only; S: Unknown function; T: Signal transduction mechanism; U: Intracellular trafficking, secretion and vesicular transport; V: defense mechanisms. B) Distribution of the similarity between PMP1 and other CNTs. The X-axis represents the protein sequence position and the Y-axis shows the percentage of identity between PMP1 and other CNT in each sequence position. Alignment of the C terminus (C) and a LC fragment (D) of PMP1 and different BoNTs, with the SxWY ganglioside binding site and the conserved motif HELXH in the catalytic site respectively boxed.

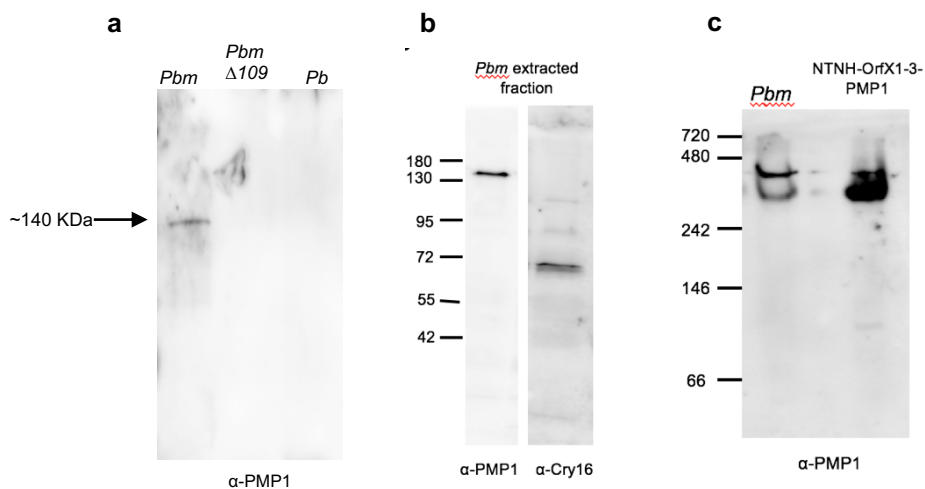

**Supplementary Figure 2. Expression of proteins encoded by *ptox*.** A) PMP1 is immunodetected in *Pbm* culture, but not in the *Pbm* loss of function mutant *Pbm* $\Delta 109$ , or in the type strain *Pb*. B) Immunodetection of PMP1 and Cry16 in a western blot of the *Pbm* extracted fraction. C) Western blot of a native PAGE of *Pbm* extracted fraction (left lane) and whole culture of *B. thuringiensis* expressing NTNH-OrfX1-3-PMP1 construct (right lane). Complexes of similar sizes are observed in both samples.

**a**

MGSSHHHHHSQDPMTKDRLAALQAAQSDDEMPEDVAVPVEGSFMEFFKEVEEIRMMIDKIQANVEEVKHH  
 SAILSAPQSDEKTKQLELDLADIKKTANRVRGKLGIEQNIQEEQQSKSNADLRIRKTQHSALSRRKFVEVMT  
 EYNRTQTDYRERCKGRIQRQLEITGRATTNEELEMLEQGN SAVFTQGIIMETQQAQQTLDI EARHADI I KLE  
 NSIRELHDMFMDMAMLVESQGEMIDRIEYHVE **HAMDYVQTATQDTKKALKYSEQKLI SEEDLEQKLI SEEDL**

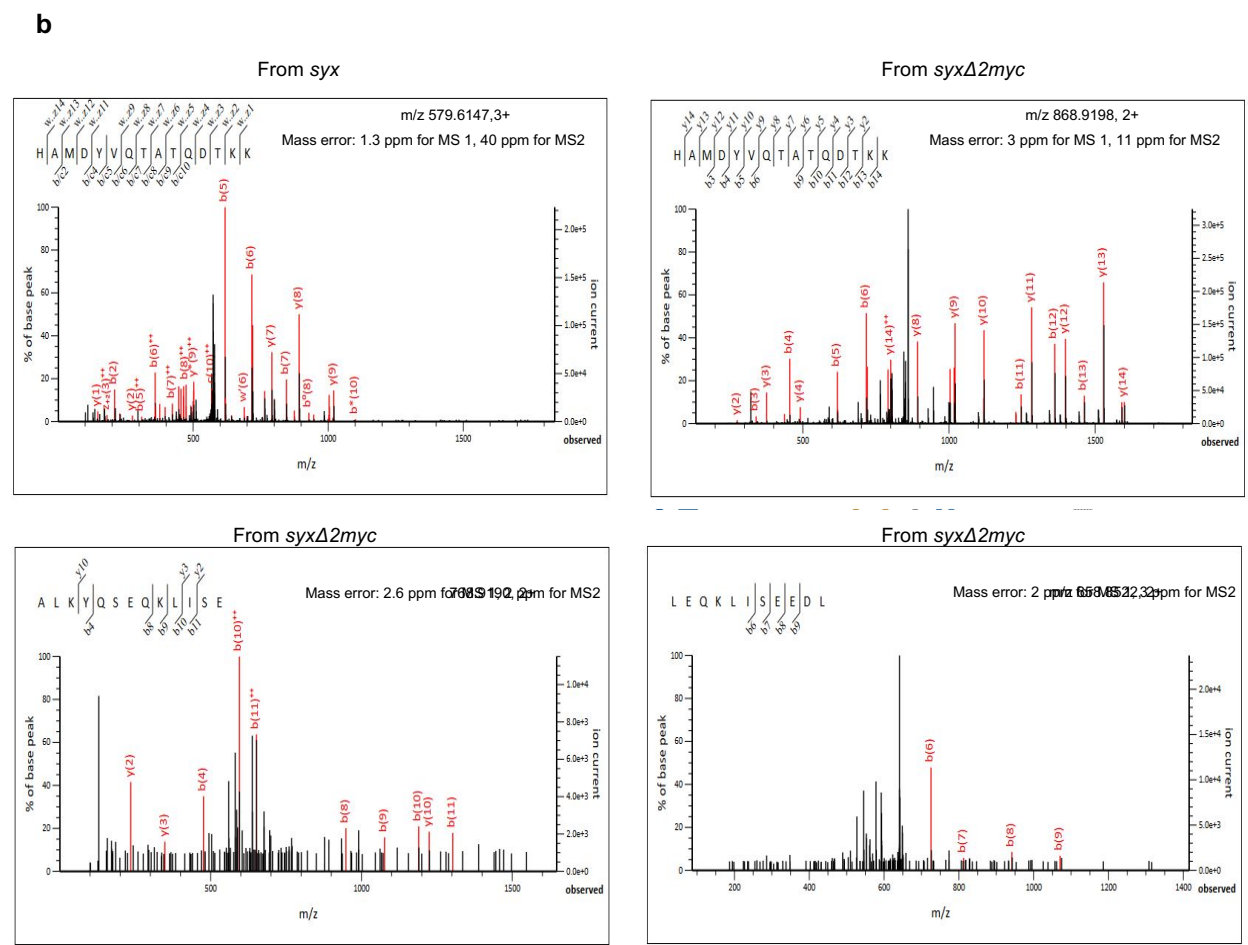

**Supplementary Figure 3.** Mass spectrometric data from syntaxin cleavage. A) Mass spectrometry of *syxΔ2myc* mutant cleaved with PMP1 LC identifies unique sequences (in blue) that are not observed in *syxΔ2myc* incubated with buffer or with the PMP1 E209Q mutant. B) Mass spectrometry spectra of the peptides from His-syntaxin detected only in the sample where His-syntaxin was incubated with PMP1 LC and not in the control or incubated with PMP1 E209Q mutant.

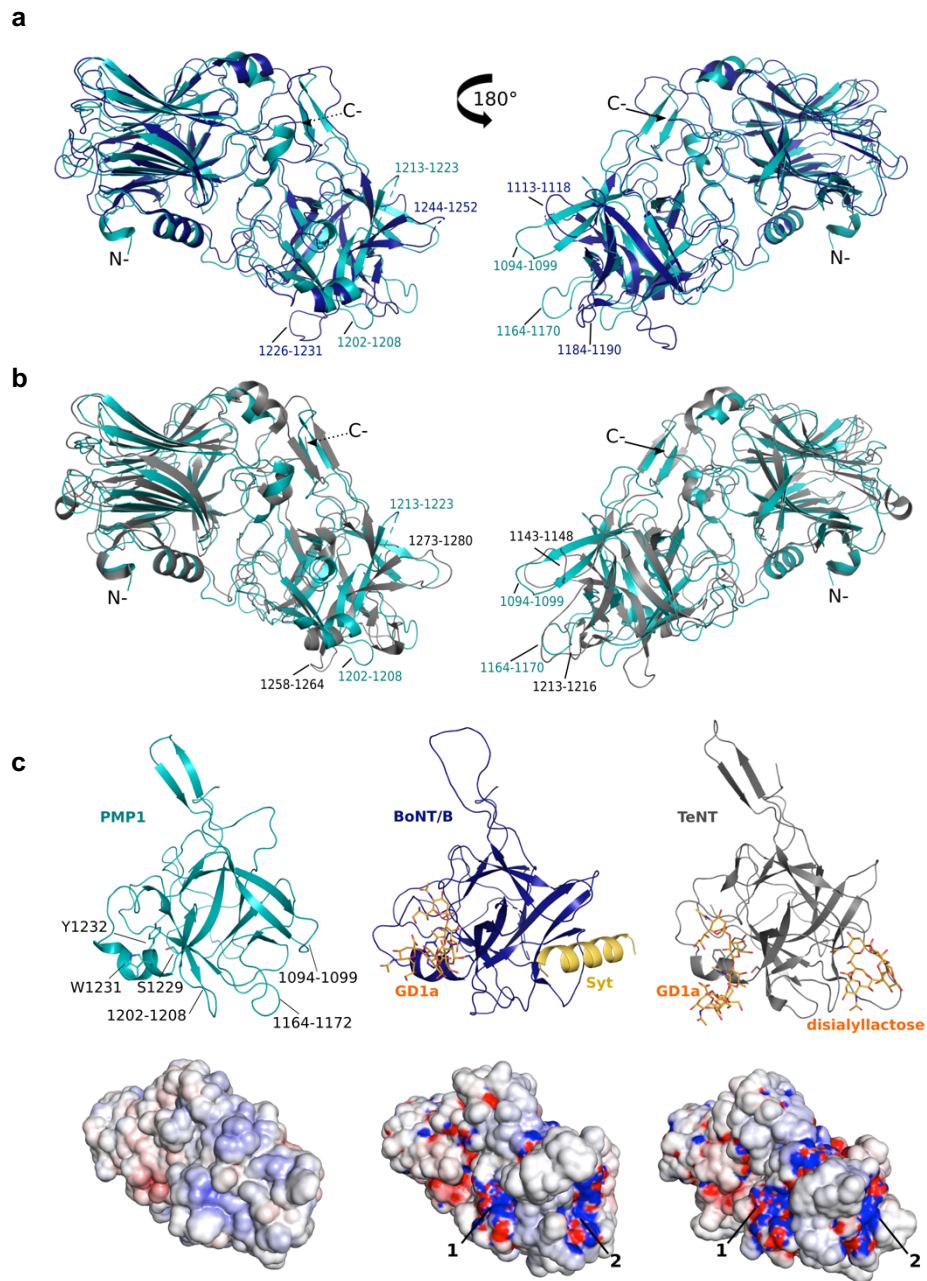

**Supplementary Figure 4.** Structure of PMP1-H<sub>C</sub>. Superimposition of the PMP1-H<sub>C</sub> crystal structure (cyan) with the crystal structure of BoNT/B-H<sub>C</sub> (blue, PDB 4KBB) (A) and with the crystal structure of TeNT-H<sub>C</sub> (grey, PDB 5N0B) (B). C) BoNT/B-H<sub>C</sub> (blue, middle panel) in complex with its receptors, synaptotagmin (yellow) and GD1a (orange) (PDB 4KBB) and TeNT (grey, right panel) in complex with GD1a (orange) (PDB 5N0B) and a disialyllactose (orange, PDB 1YYN). The corresponding electrostatic surface potential of PMP1, BoNT/B and TeNT, is shown below each structure, calculated with the APBS tool in PyMol (scale -10 to +10, red to blue for the three structures). The receptor-binding sites of BoNT/B and TeNT are labeled as 1 (ganglioside) and 2 (protein receptor/sialic acid).

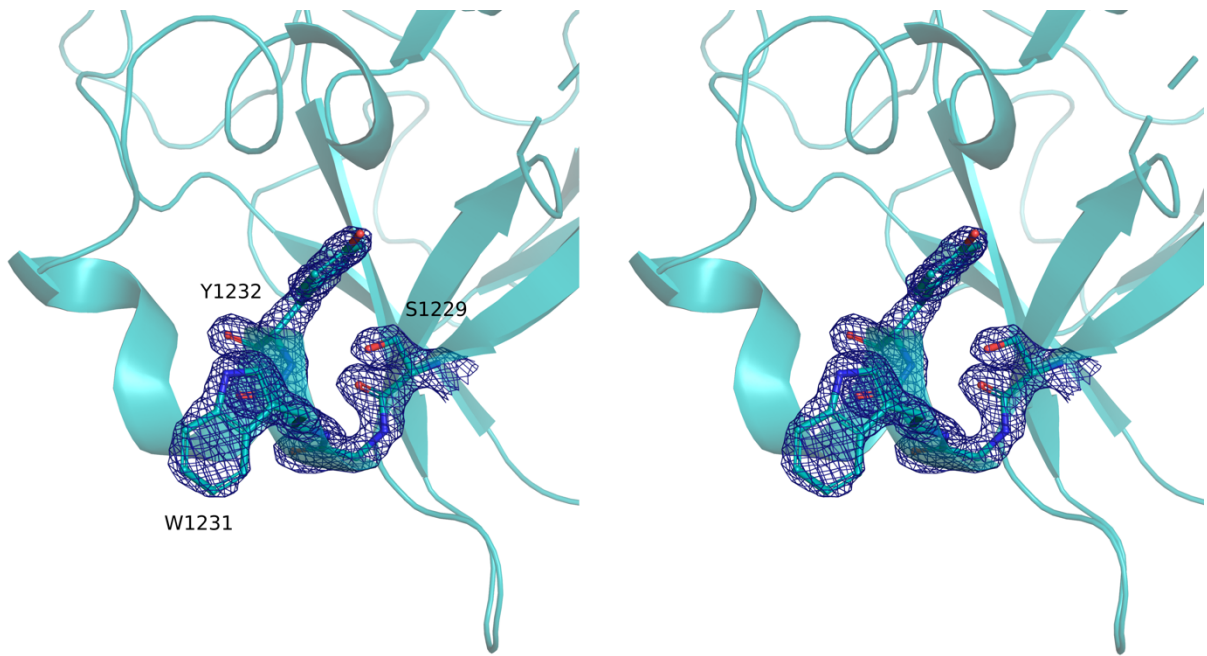

**Supplementary Figure 5. Close-up view of the conserved SGWY motif of PMP1. Stereo image with  $(2F_o - F_c)$  electron-density map (contoured at 2.0 sigma) around residues [1229-1232].**

**Supplementary Table 1. Toxicity of *Pbm*, *Pbp* and *Bti* to 3rd instar *Aedes aegypti*, *Anopheles coluzzi* and *Anopheles stephensi* mosquito larvae and to *Drosophila melanogaster* larvae. LC50 is represented as volume of whole culture in 100 ml water and in CFU/ml water. Note that the lower toxicity of *Pbp* in comparison to *Pbm* could be at least partially due to a lower CFU/ml in the culture.**

|                   | LC50                                                                      |                                                                              |                                                                                 |                         |
|-------------------|---------------------------------------------------------------------------|------------------------------------------------------------------------------|---------------------------------------------------------------------------------|-------------------------|
|                   | in $\mu$ l culture (95% confidence interval) / in CFU per ml              |                                                                              |                                                                                 |                         |
|                   | <i>A. aegypti</i>                                                         | <i>An. gambiae</i>                                                           | <i>An. stephensi</i>                                                            | <i>D. melanogaster</i>  |
| <b><i>Bti</i></b> | 1.1x10 <sup>-3</sup><br>(0.5x10 <sup>-3</sup> -2x10 <sup>-3</sup> ) / 902 | 3.4x10 <sup>-3</sup> (2.1x10 <sup>-3</sup> -4.9x10 <sup>-3</sup> )<br>/2788  | 17.1x10 <sup>-3</sup> (11.7x10 <sup>-3</sup> -24.8x10 <sup>-3</sup> )<br>/14022 | ND                      |
| <b><i>Pbm</i></b> | 8x10 <sup>-3</sup> (1.8x10 <sup>-3</sup> -22.5x10 <sup>-3</sup> ) / 45    | 1.8x10 <sup>-3</sup> (0.9x10 <sup>-3</sup> -3.2x10 <sup>-3</sup> ) /10       | 3.9x10 <sup>-3</sup> (2.7x10 <sup>-3</sup> -5.3x10 <sup>-3</sup> ) /22          | ND/>3.4x10 <sup>6</sup> |
| <b><i>Pbp</i></b> | > 1000 / >400                                                             | 20.2x10 <sup>-3</sup> (14.1x10 <sup>-3</sup> -28.5x10 <sup>-3</sup> )<br>/ 1 | ND                                                                              | ND                      |



**Supplementary Table 2. Sequencing data of the *Pb malaysia* predicted genes.**

| <b>Gene prediction</b>               |           |
|--------------------------------------|-----------|
| Gene Number                          | 3,835     |
| Gene Length (bp)                     | 3,319,296 |
| GC Content in Gene Region (%)        | 28.77     |
| Gene Length / Genome (%)             | 85.05     |
| Gene Average Length (bp)             | 865       |
| Intergenic Region Length (bp)        | 583.317   |
| GC Content in Intergenic Region (%)  | 23.95     |
| Intergenic Region Length /Genome (%) | 14.94     |

**Supplementary Table 3. Proteins identified by mass spectrometry from *Pbm* extracted fraction encoded by the 109, 7.2 and 4 kb *Pbm* and *Pbp* plasmids. Proteins from cry and Ptox toxin loci are highlighted in grey.**

| Protein                      | Mass   | E1    |       | E2     |       |
|------------------------------|--------|-------|-------|--------|-------|
|                              |        | emPAI | score | emPAI  | score |
| <b>109Kb plasmid</b>         |        |       |       |        |       |
| OrfX2                        | 83955  | 18.50 | 9184  | 87.28  | 17648 |
| Cry16                        | 71353  | 9.04  | 4702  | 20.66  | 10002 |
| Hemolysin 2                  | 17452  | 44.17 | 4078  | 487.85 | 5926  |
| Hemolysin 1                  | 17189  | 17.06 | 1264  | 123.36 | 3497  |
| OrfX3                        | 54972  | 0.85  | 277   | 9.78   | 3397  |
| NTNH                         | 136370 | 1.54  | 2016  | 0.75   | 997   |
| OrfX1                        | 16828  | 4.59  | 301   | 18.10  | 1446  |
| Cry17                        | 71513  | 1.73  | 1435  | 0.06   | 50    |
| CMP1                         | 146228 | 0.95  | 1198  |        |       |
| P47                          | 48060  | 0.19  | 203   |        |       |
| replication protein          | 46003  | 0.10  | 74    | 0.10   | 43    |
| HA                           | 51457  | 0.09  | 29    |        |       |
| unknown 003765               | 65930  | 0.07  | 22    | 0.07   | 25    |
| transposase A                | 43000  |       |       | 0.10   | 23    |
| unknown 003771               | 21473  |       |       | 0.21   | 23    |
| unknown 003832               | 22289  |       |       | 0.21   | 22    |
| chromosome partitioning parB | 50615  |       |       |        |       |
| <b>7.2 Kb plasmid</b>        |        |       |       |        |       |
| unknown 002500               | 12266  | 0.40  | 51    | ND     | 17    |
| <b>4 Kb plasmid</b>          |        |       |       |        |       |
| unknown 002508               | 21658  | 0.21  | 189   | 0.21   | 119   |

**Supplementary Table 4. Primers used for gene amplification, cloning and site-directed mutagenesis.**

| Primer | use                 | sequence                                                       |
|--------|---------------------|----------------------------------------------------------------|
| 1      | PMP operon Fw       | GGCGCGCCATGGACATAATTGACAATGTAG                                 |
| 2      | PMP operon Rv       | CTCGAGCTATTCCCTTCCATCCTTCATC                                   |
| 3      | NTNH Fw             | CCCGGGATCCAATAATAGAAGGATATCAAAT                                |
| 4      | NTNH Rv             | GCGGCCGCCCATTCATCGAAACATTCCCATCAT                              |
| 5      | PMP1 Fw             | CTCGAGATATTTATTATAGATACCTTAAAGG                                |
| 6      | PMP1 Rv             | CCACTTAATTGGTCAAATAACTATTCTTAATATGCTA                          |
| 7      | E209Q Fw nested     | CGGCATCGAGCCTGACGCACCAACTGATCCATGCTCTGCAC                      |
| 8      | E209Q Rv nested     | GTGCAGAGCATGGATCAGTTGGTGCCTCAGGCTCGATGCCG                      |
| 9      | PMP1/E209Q Fw       | GGATCC CTGCAAATCCGTGCTTTAACTATAACG                             |
| 10     | PMP1/E209Q Rv       | GGGCCACATACGGGATAATCCAAGAGATGTC                                |
| 11     | PMP1 Hc Fw          | GGATCCGAATGCCCTGATCGATCGCTGGGTA                                |
| 12     | PMP1 Hc Rv          | AAGCTTTCATTCTTCCAACCTTCATCTTCC                                 |
| 13     | PMP1 LC Fw          | CCATGGACTACAAAGACGATGACGACAAGCTGCAAATCCGTGCTTTAACTATAACG       |
| 14     | PMP1 LC Rv          | AAGCTTTCACAGTTTAACTTTTTTCGAGATCAG                              |
| 15     | His syx Fw          | CGGGATCCGATGACGAAGGACAGATTAGCAGCCCT                            |
| 16     | His syx Rv          | GGCGCGCCTTACAGGTCTTCTTCAGAG                                    |
| 17     | H252N Fw            | GATTGATCGTATAGAATATAACGTCGAACATGCAATGG                         |
| 18     | H252N Rv            | CCATTGCATGTTTCGACGTTATATTCTATACGATCAATC                        |
| 19     | L271V Fw            | CAAGACACAAAGAAAGCGGTCAAATATCAAAGCAAAGC                         |
| 20     | L271V Rv            | GCTTTGCTTTGATATTTGACCGCTTTCTTTGTGTCTTG                         |
| 21     | T264V Q265S Fw      | GATTATGTTCAAACAGCGGTGTCTGACACAAAGAAAGCGC                       |
| 22     | T264V Q265S Rv      | GCGCTTCTTTGTGTGTCAGACCCGCTGTTTGAACATAATC                       |
| 23     | Q261E T262R Fw      | CAATGGATTATGTTGAAAGAGCGACACAAGACACAAAG                         |
| 24     | Q261E T262R Rv      | CTTTGTGCTTGTGTCGCTCTTCAACATAATCCATTG                           |
| 25     | M257V Fw            | CACGTCGAACATGCAGTGGATTATGTTCAAACAGCGAC                         |
| 26     | M257V Rv            | GTCGCTGTTTGAACATAATCCACTGCATGTTTCGACGTG                        |
| 27     | syx $\Delta$ 2myc 1 | GTTCCAGGTCTTCTTCAGAGATCAGTTTCTGTTTCGCTTTGATATTTAAGCGCTTCTTTG   |
| 28     | syx $\Delta$ 2myc 2 | GGCGCGCCTTACAGGTCTTCTTCAGAGATCAGTTTCTGTTCCAGGTCTTCTTCAGAGATCAG |
