# Supplementary material for: A neurotoxin that specifically targets Anopheles mosquitoes
Source: PubMed Central journal article supplement (PMC6599013; doi:10.1038/s41467-019-10732-w), 2019-06-28
Supplement: 41467_2019_10732_MOESM4_ESM.pdf [file 41467_2019_10732_MOESM4_ESM.pdf]

## **Description of Additional Supplementary Files**

File Name: Supplementary Data 1

Description: Annotation of Pbm and Pbp 109Kb plasmid

File Name: Supplementary Movie 1

Description: PMP1 produces slowing of motion in *Aedes* mosquito larvae. Fragments of video recording (3 s) of 15 *A. aegypti* 4th instar larvae after 15 min and 1 to 6h after injection with water (control), PMP1 and PMP1 E209Q mutant.
